# Supplementary material for: Digestion of isolated legume cells in a stomach-duodenum model: three mechanisms limit starch and protein hydrolysis
Source: Royal Society of Chemistry journal article supplement (doi:10.1039/c7fo00086c), 2017-01-01
Supplement: c7fo00086c1.pdf [file c7fo00086c1.pdf]

# **Digestion of isolated legume cells in a stomach-duodenum model: three mechanisms limit starch and protein hydrolysis**

*Rewati R. Bhattarai<sup>a</sup>, Sushil Dhital<sup>a</sup>, Peng Wu<sup>b,c</sup>, Xiao Dong Chen<sup>c,d</sup> and Michael  
J. Gidley<sup>a\*</sup>*

<sup>a</sup>ARC Centre of Excellence in Plant Cell Walls, Centre for Nutrition and Food Sciences, Queensland Alliance for Agriculture and Food Innovation, The University of Queensland, St Lucia, Qld 4072, Australia.

<sup>b</sup>Centre for Nutrition and Food Sciences, Queensland Alliance for Agriculture and Food Innovation, The University of Queensland, St Lucia, Qld 4072, Australia.

<sup>c</sup>Department of Chemical Engineering and Biochemical Engineering, College of Chemistry and Chemical Engineering, Xiamen University, Xiamen 361005, China.

<sup>d</sup>School of Chemical and Environmental Engineering, College of Chemistry, Chemical Engineering and Materials Science, Soochow University, Suzhou 215123, China.

\* Corresponding author.

Phone: +61 7 3365 2145; Fax: +61 7 3365 1177. Email address: [m.gidley@uq.edu.au](mailto:m.gidley@uq.edu.au) (M. J. Gidley)

## Supplementary data

### S1. First order and LOS fits for starch and protein hydrolysis in intact cells

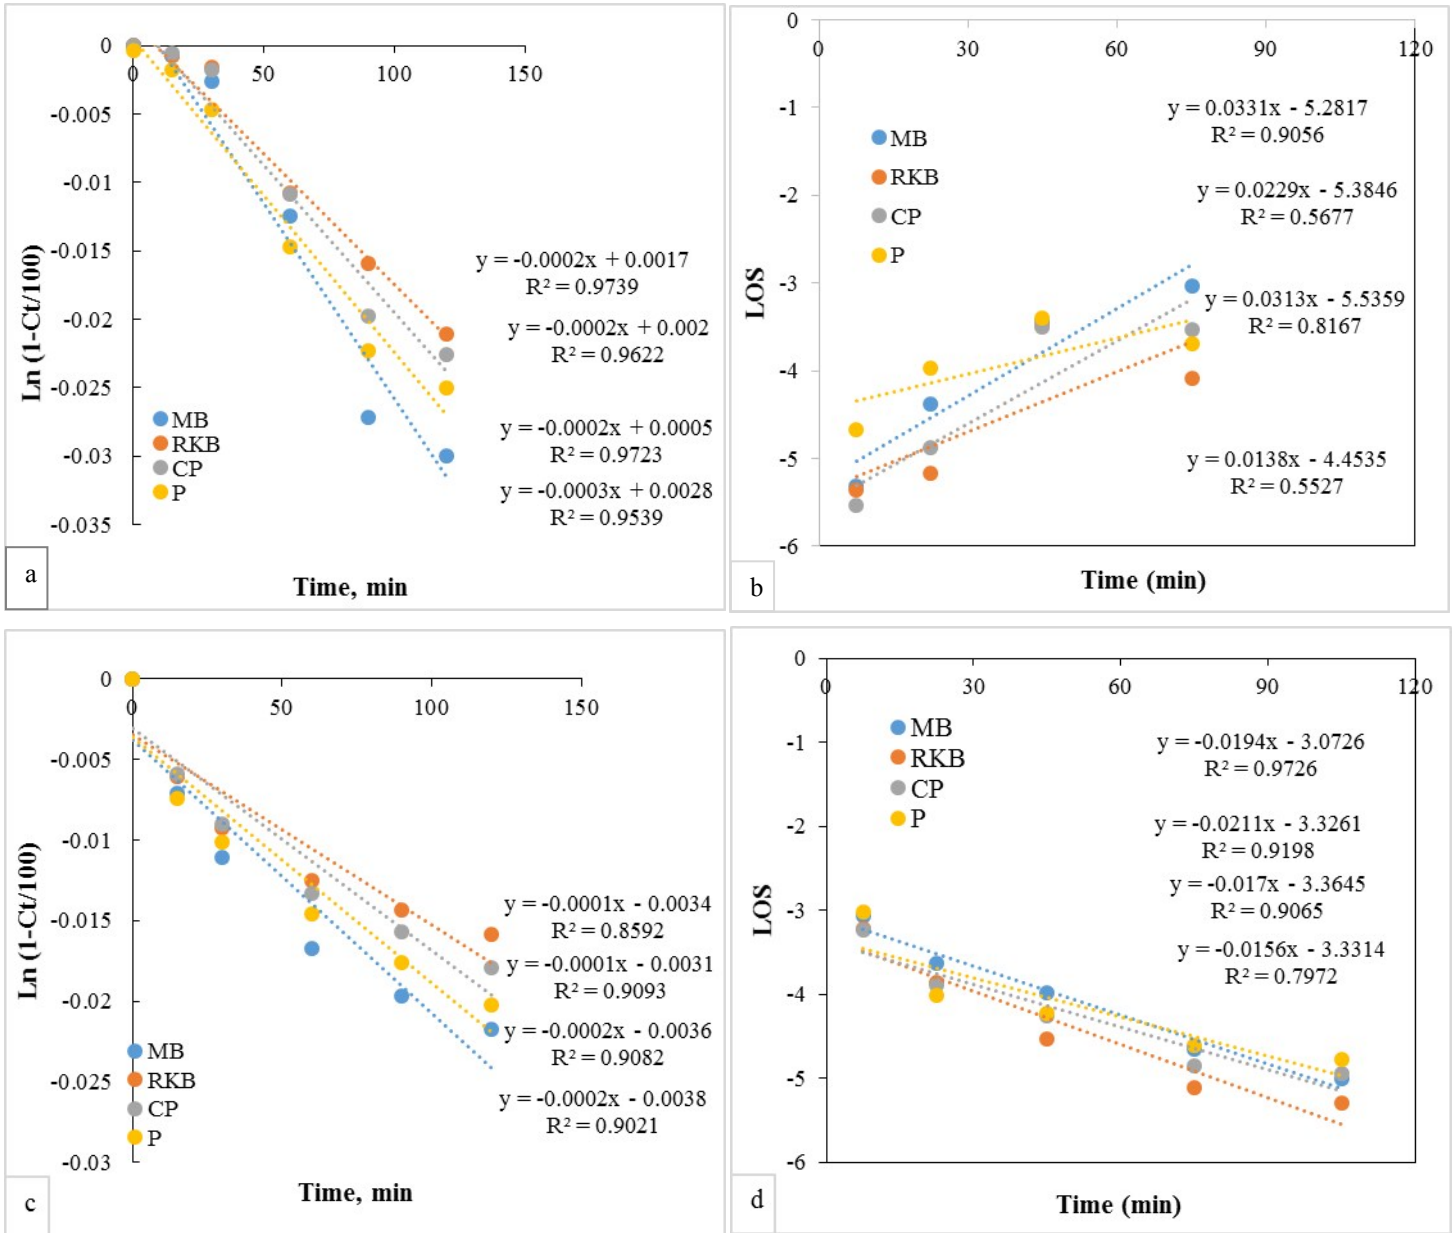

**Fig. S1.** First order and LOS fits of data for intact cells where (a, b): starch hydrolysis, (c, d): protein hydrolysis; MB= mung bean, RKB= red kidney bean, CP= chickpea and P= pea.

**S2. First order and LOS fits for starch and protein hydrolysis in broken cells**

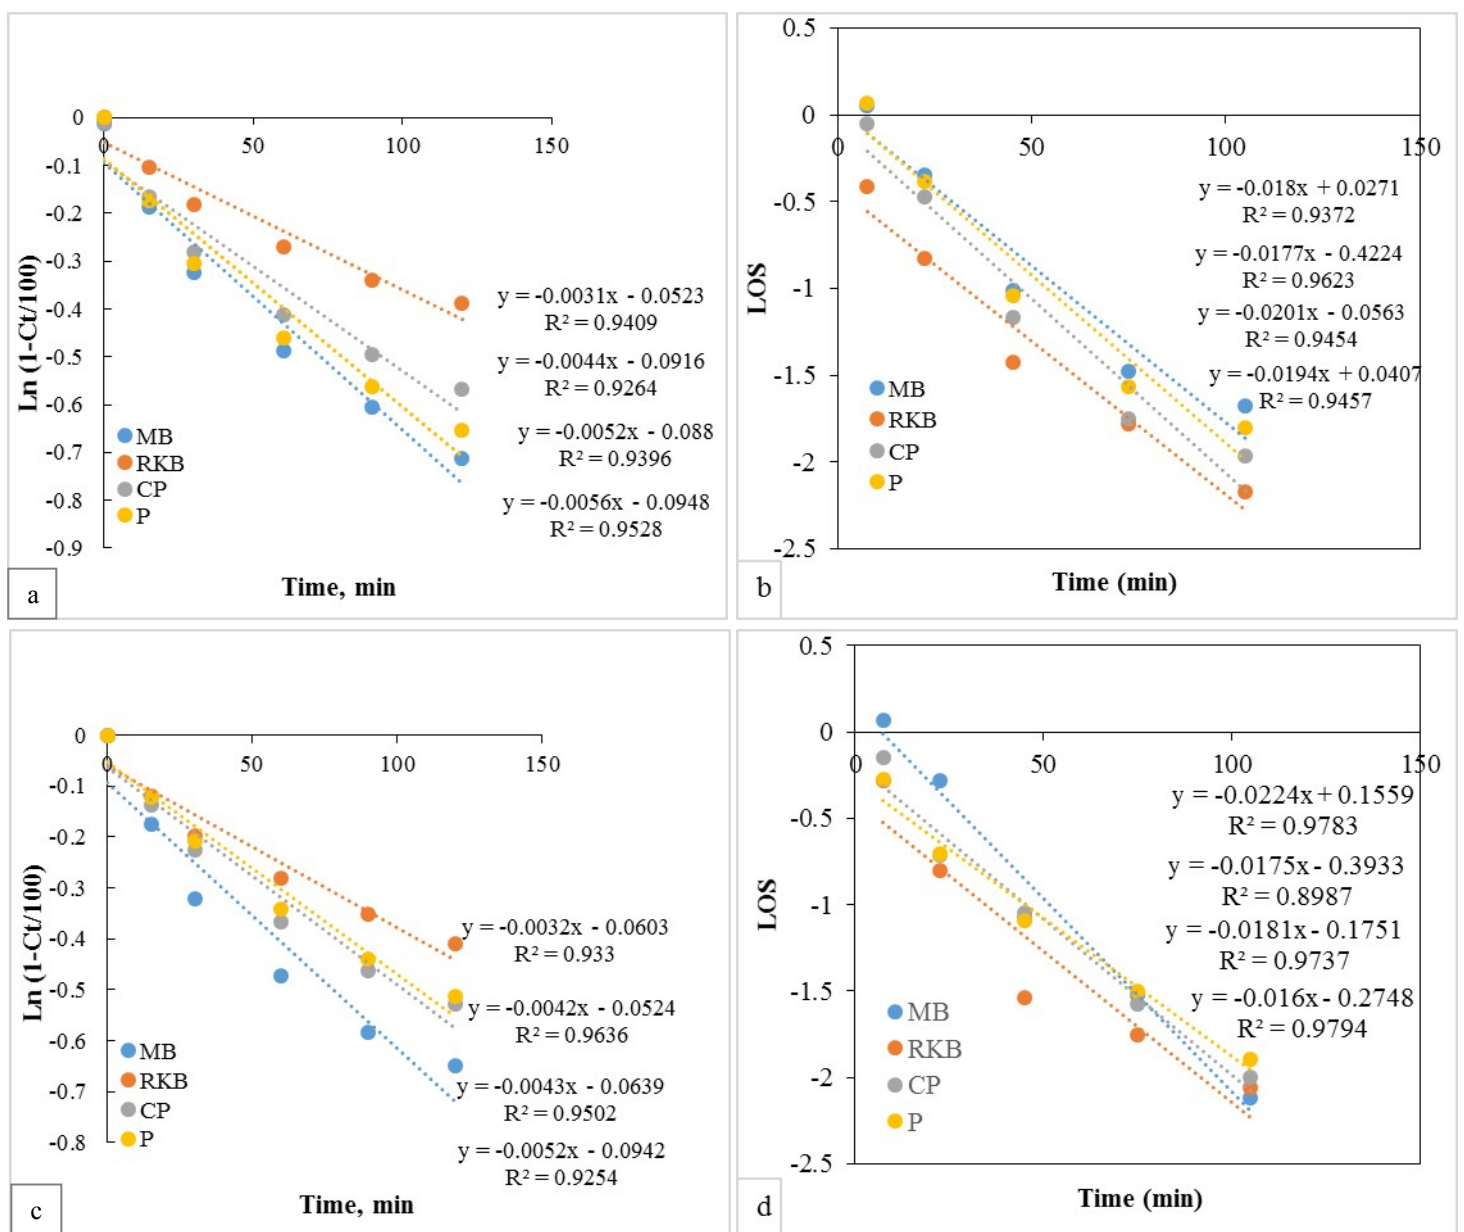

### S3. First order fits for starch hydrolysis in case of binding experiments

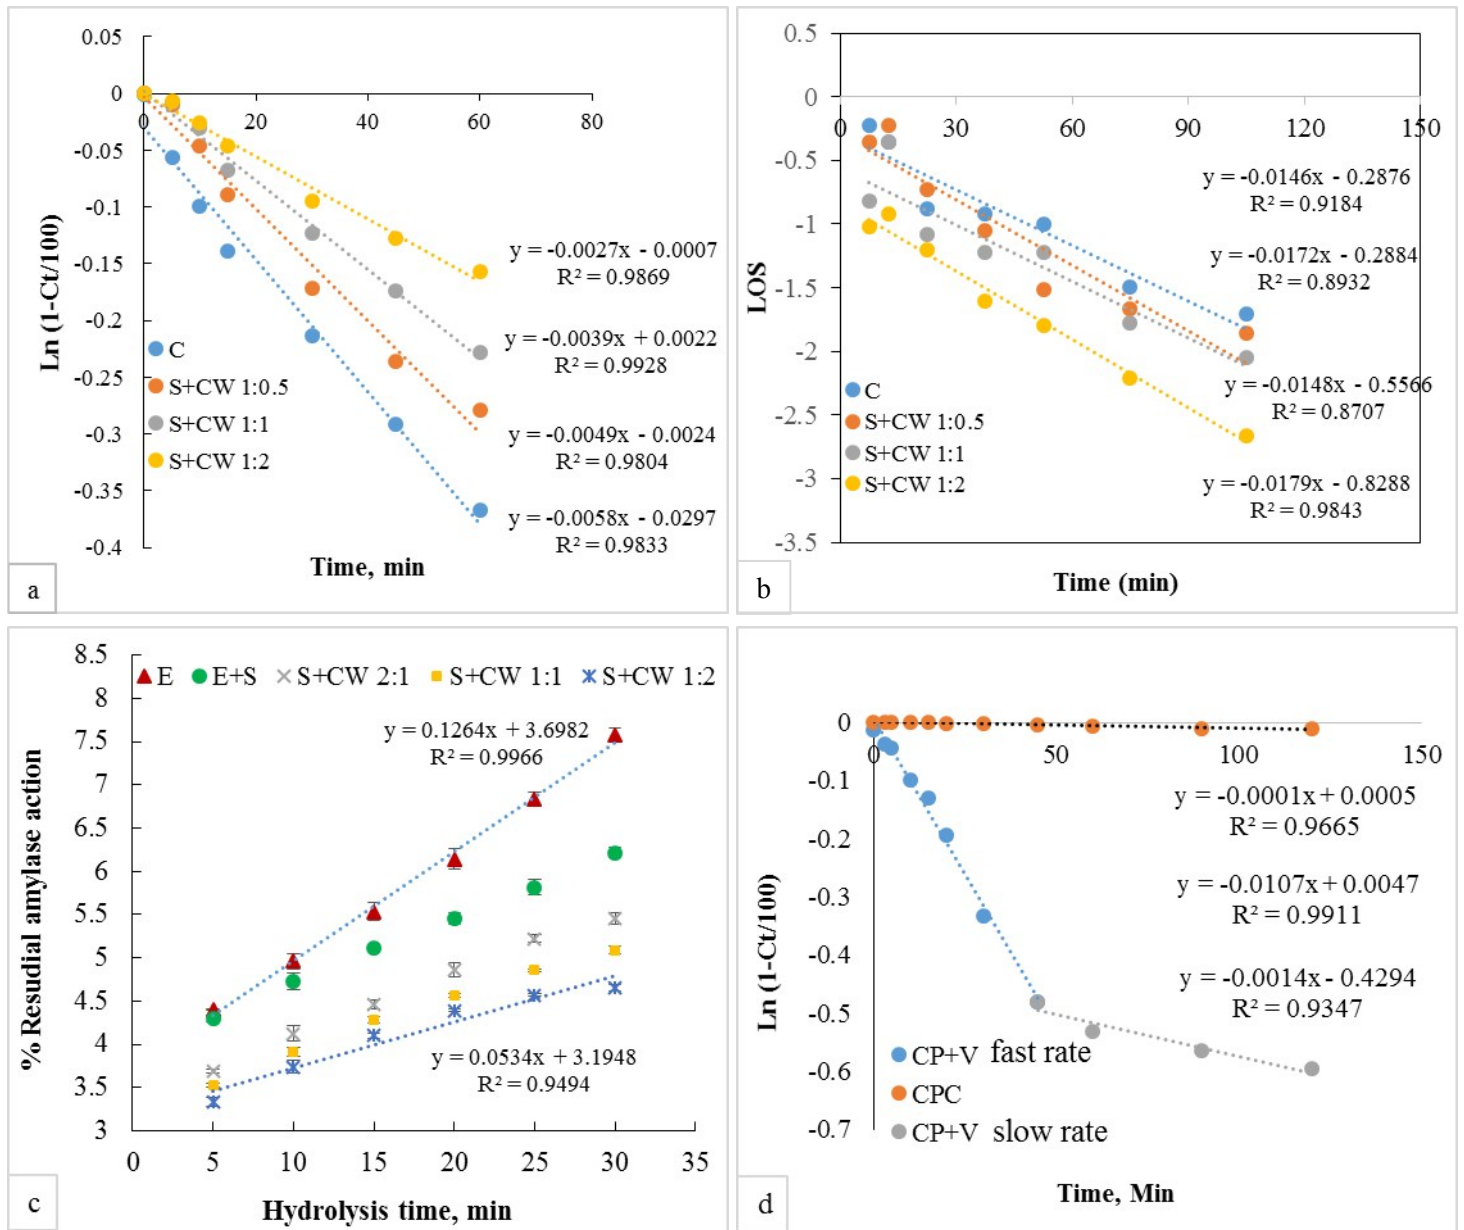

**Fig. S3.** First order and LOS fits of data for starch hydrolysis in binding experiments (a, b): with added cell wall components to starch-protein mixture at different ratios, (c): linear equation for solution depletion method to assay amylase activity, (d): viscozyme treated chickpea cells; E=  $\alpha$ -amylase, S= starch, CW= cell wall components, CP= chickpea, C= control and V= viscozyme.

### S4. First order and LOS fits for protein hydrolysis

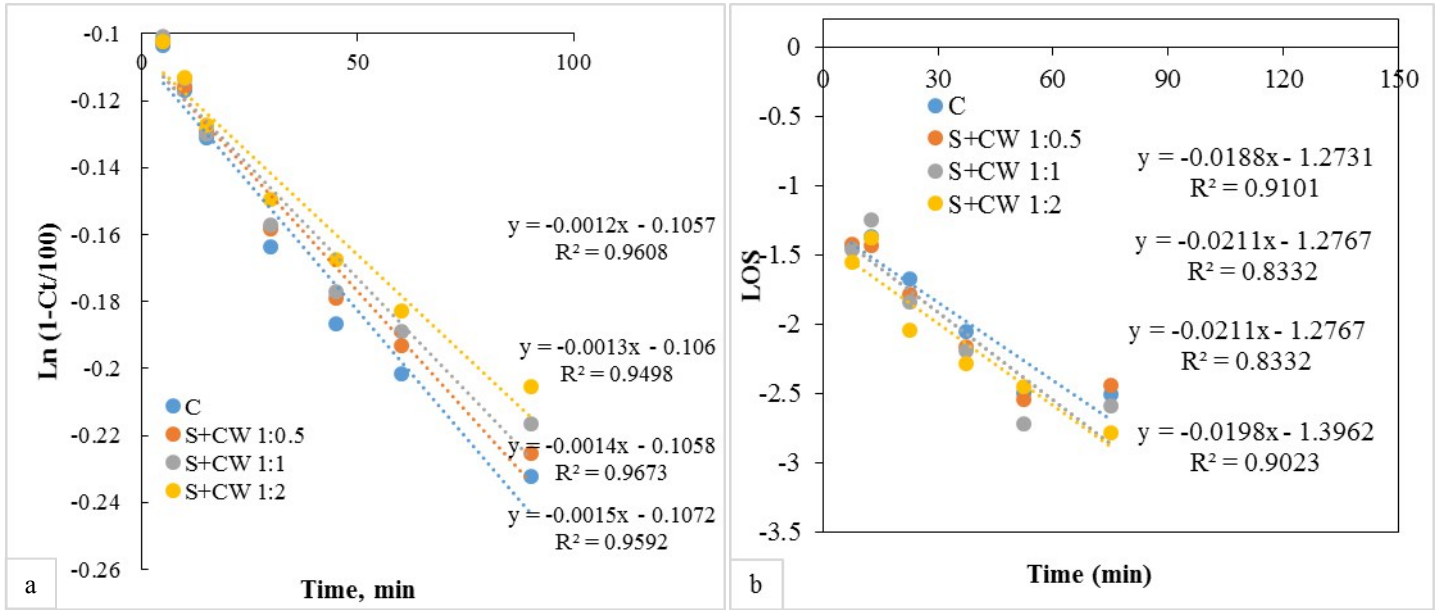

**Fig. S4.** First order (a) and LOS (b) plots of data for protein hydrolysis for binding experiments with added cell wall components to starch-protein mixture at different ratios; MB= mung bean, RKB= red kidney bean, CP= chickpea and P= pea.
